# Supplementary material
Source: publisher site journal article supplement (https://content.cld.iop.org/journals/0957-4484/32/9/095502/revision4/nanoabce2dsupp1.pdf)
Supplement: Supplementary file 1 [file nanoabce2dsupp1.pdf]

## Supplementary Data

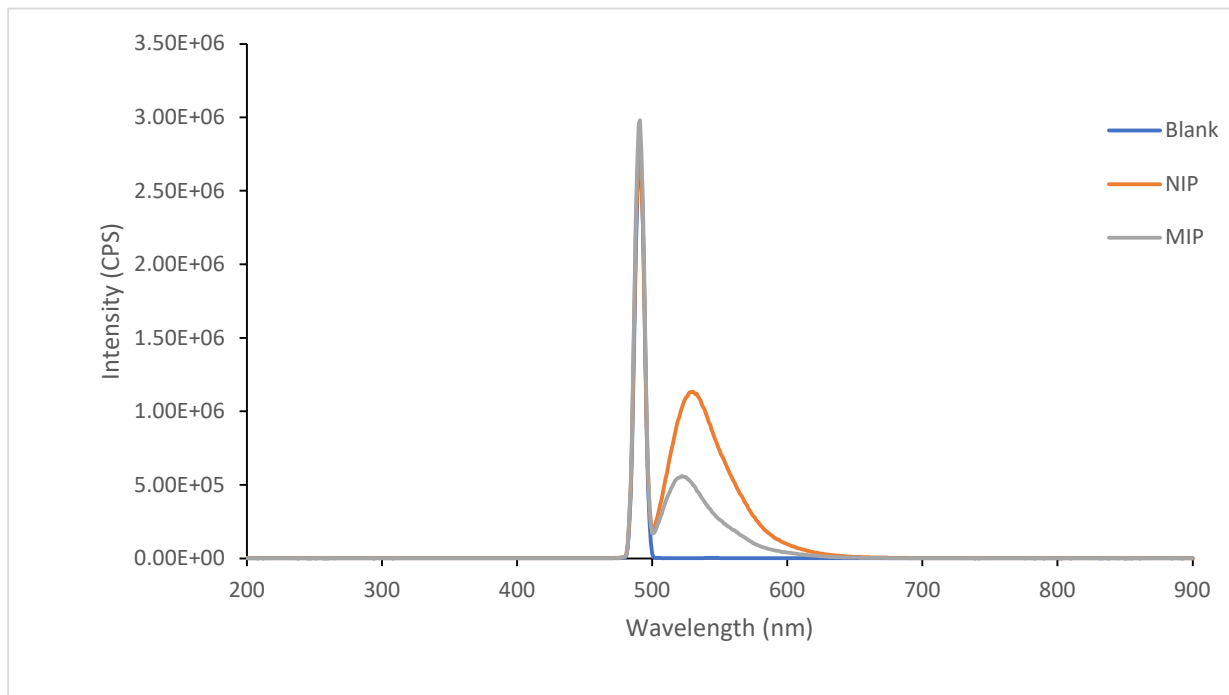

**Figure S1.** The excitation and emission spectra of Fluorescein MIP and NIP; the peak excitation wavelength is 482 nm and the peak emission wavelength is 514 nm.

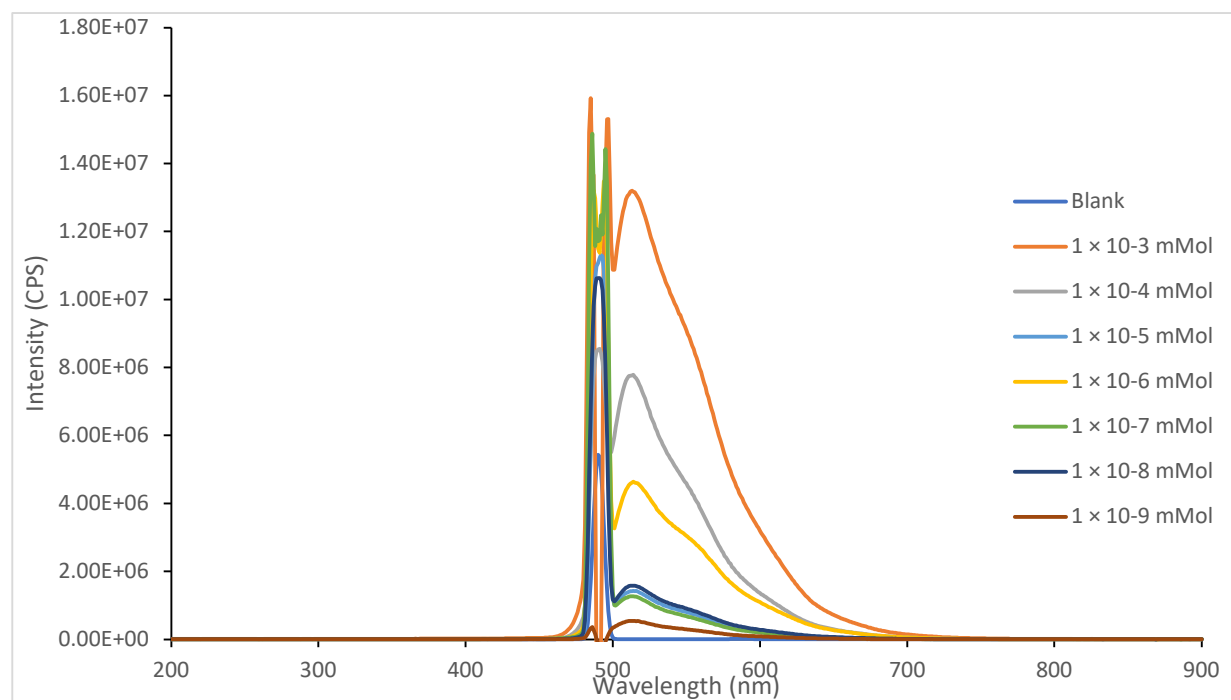

**Figure S2.** The excitation and emission spectra of Fluorescein at different concentrations ( $1 \times 10^{-9}$  to  $1 \times 10^{-3}$  mMol); the peak excitation wavelength is 482 nm and the peak emission wavelength is 514 nm.
